# Supplementary material
Source: PubMed Central journal article supplement (PMC9704519)
Supplement: NIHMS1697853-supplement-1697853_Supp_Fig1-5_Tab1-2.pdf [file NIHMS1697853-supplement-1697853_Supp_Fig1-5_Tab1-2.pdf]

## Supplementary information

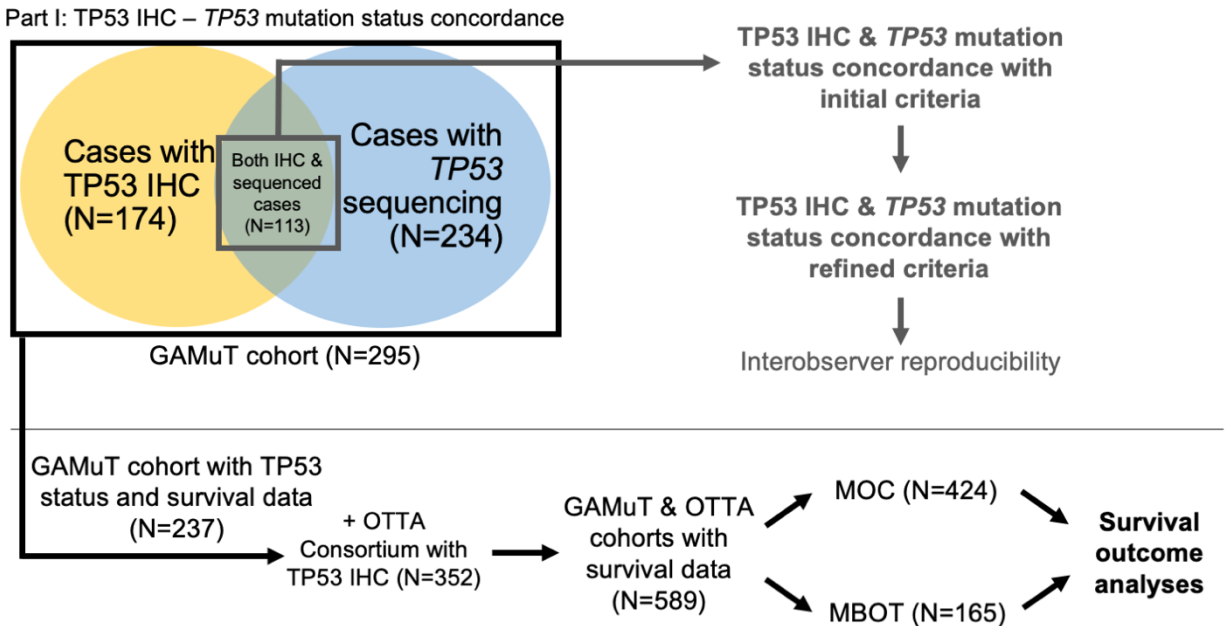

Part II: TP53 survival outcome associations

**Figure S1. Study design.** Part I: ovarian mucinous borderline tumors (MBOT) and mucinous carcinomas (MOC) from the genomic analysis of mucinous tumors (GAMuT) cohort with TP53 immunohistochemistry (IHC) and *TP53* sequencing data were used to determine concordance between IHC and mutation status by sequencing. An independent cohort with TP53 IHC was utilized to evaluate interobserver reproducibility on IHC. Part II: Cases of MBOT and MOC from the GAMuT cohort and Ovarian Tumor Tissue Analysis (OTTA) consortium with TP53 IHC and/or *TP53* mutation status by sequencing were evaluated for survival outcomes stratified by *TP53* normal or abnormal status.

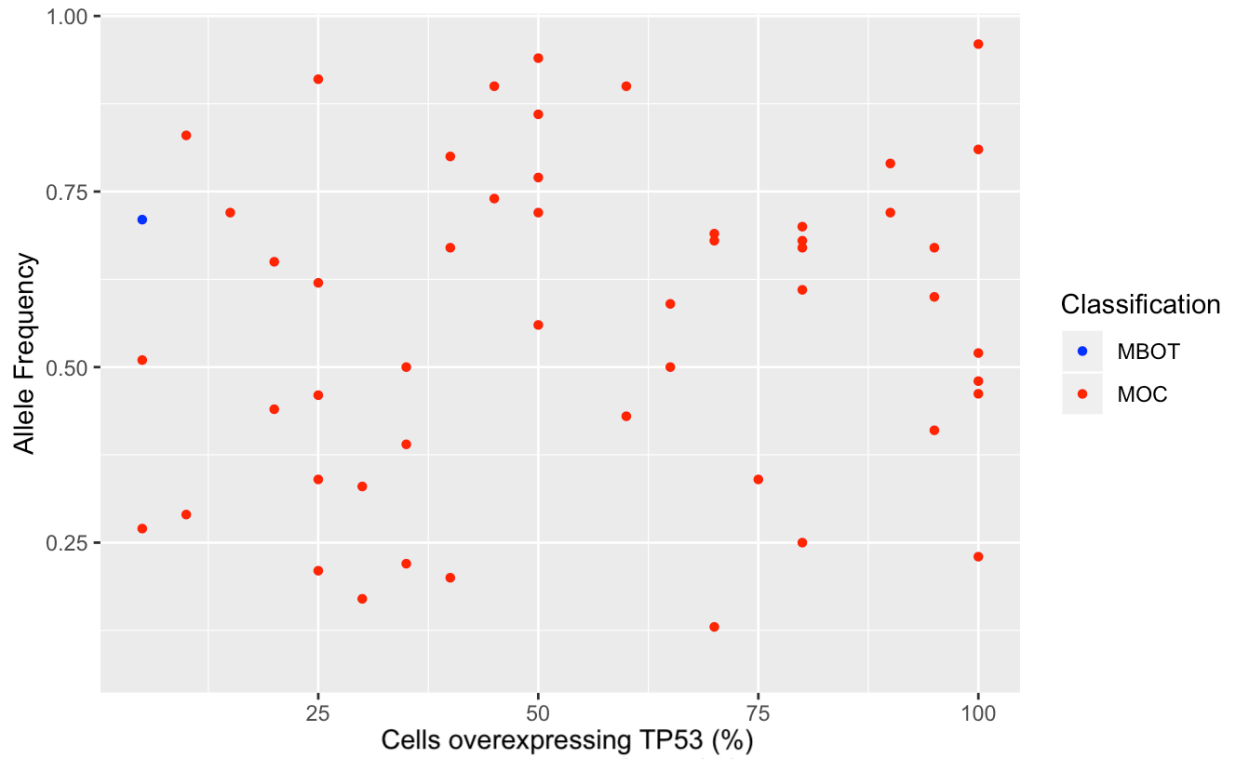

**Figure S2. Allelic frequency and percentage of tumor cells demonstrating TP53 immunohistochemistry in ovarian tumors.** Mucinous borderline tumors (MBOT; blue). mucinous carcinomas (MOC; red) ( $r=0.137$ ; Spearman correlation;  $p=0.318$ ).

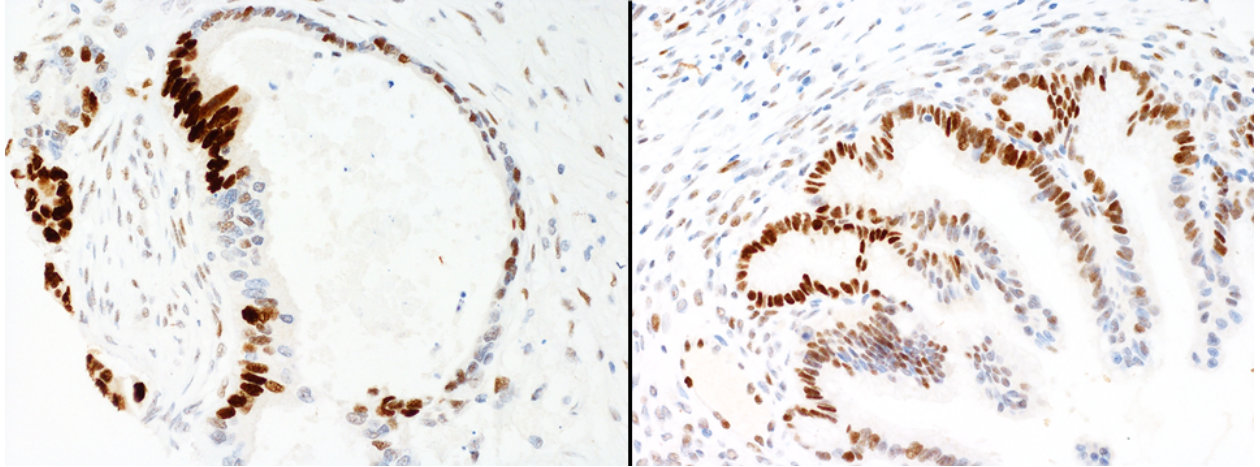

**Figure S3. Examples of cases where disagreements occurred during interobserver reproducibility studies.** These cases had final consensus scores of 5% abnormal overexpression (left) and normal (right).

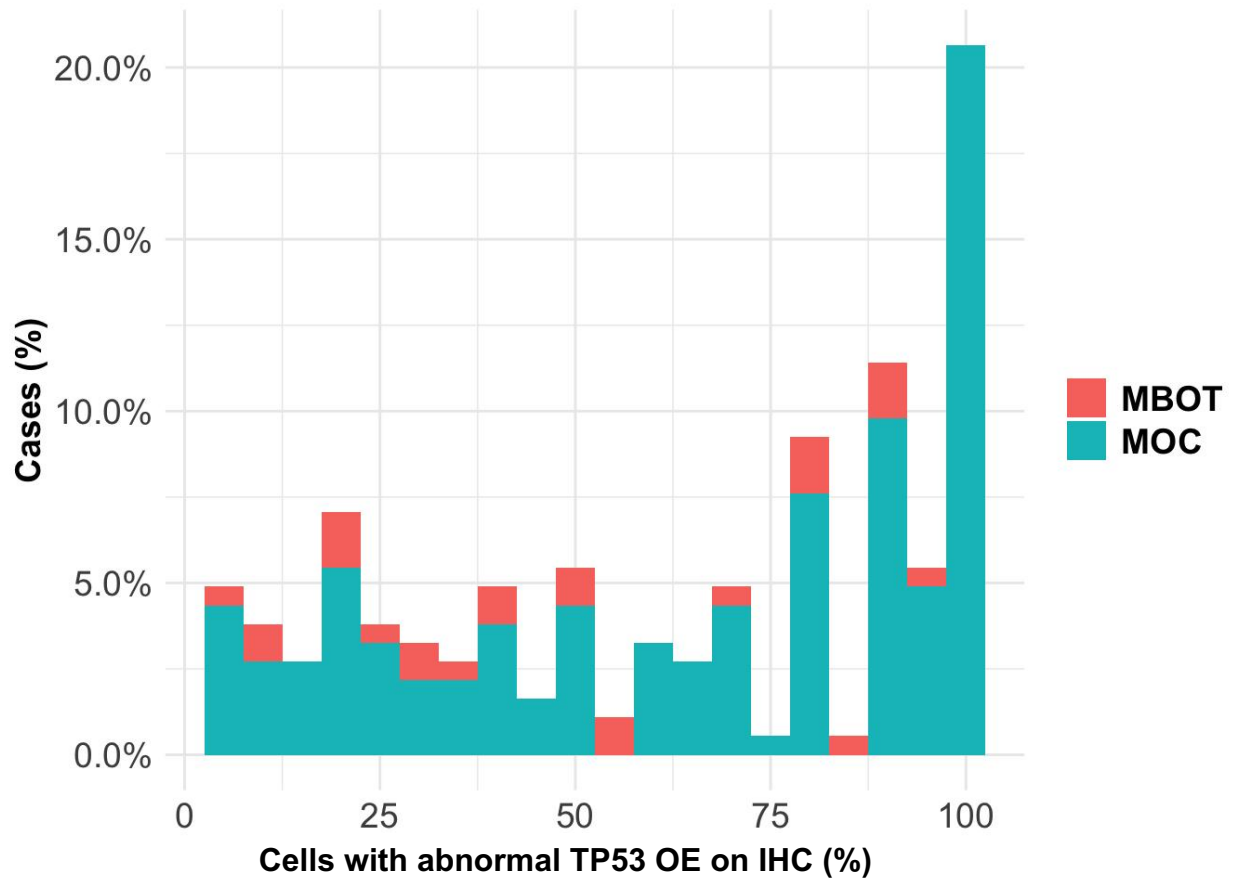

**Figure S4. Distribution of percentage of tumor cells demonstrating abnormal TP53 overexpression (OE) in ovarian mucinous borderline tumors (MBOT, N=25) and mucinous carcinomas (MOC, N=159), as a percentage of the overexpressing cases.**

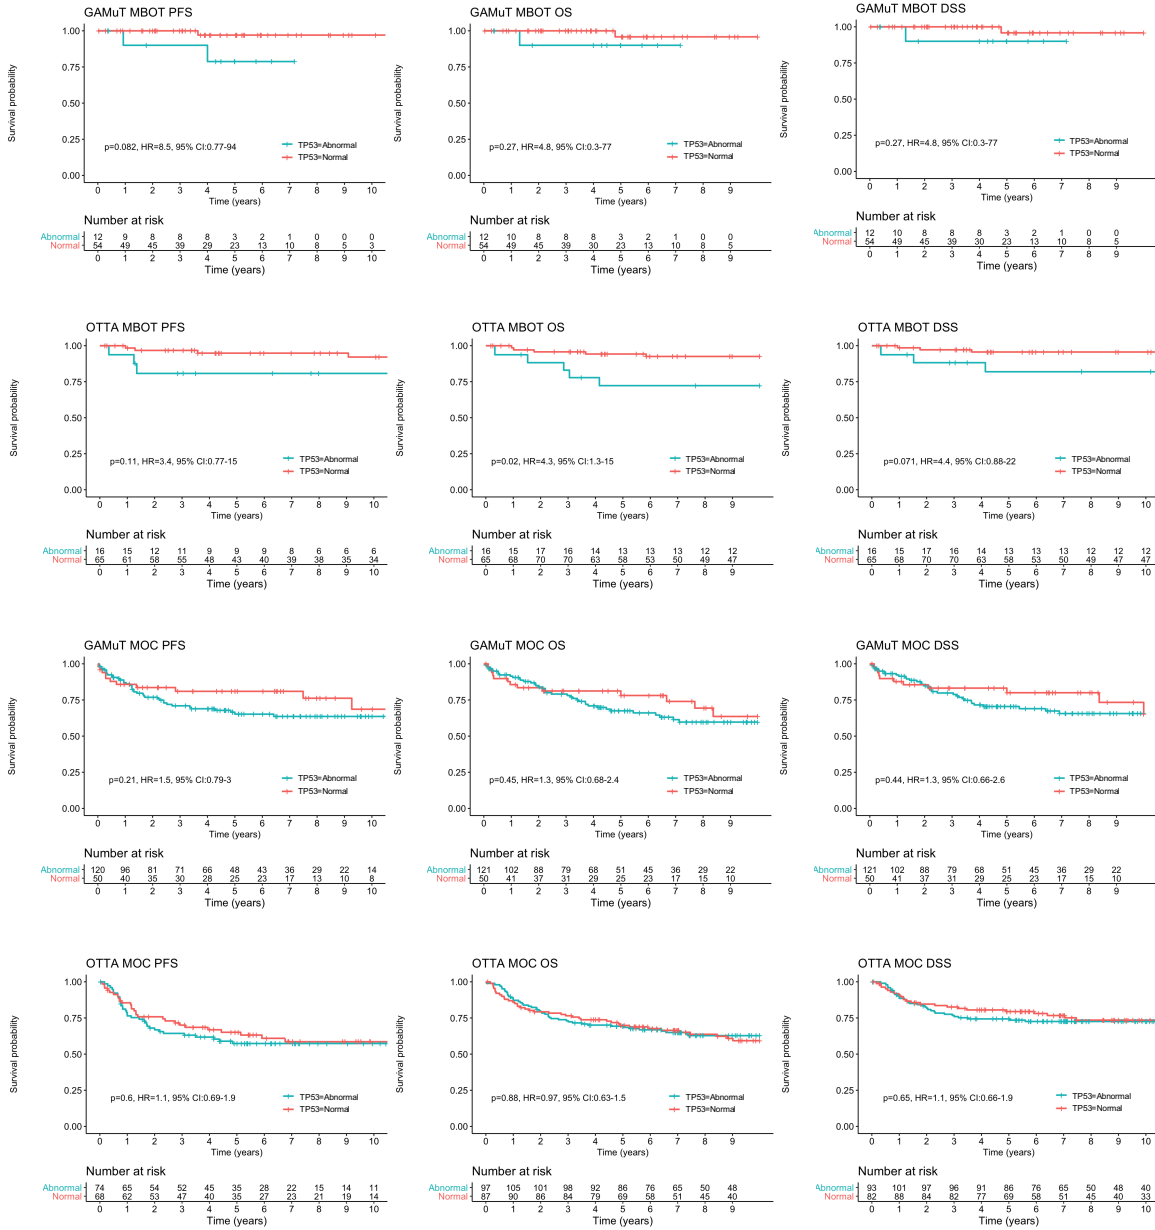

**Figure S5. Kaplan-Meier survival plots of ovarian mucinous borderline tumors (MBOT) and mucinous carcinomas (MOC) stratified by TP53 status using mutation and immunohistochemistry data. Progression free survival (PFS). Overall survival (OS). Disease-specific survival (DSS). P-values are output from coxph in R.**

**Supplementary Table 1. Ethics approval for studies from the Ovarian Tumor Tissue Analysis Consortium.**

| Study | Study name                                                      | Location  | Years        | Ascertainment                                                                                                                                         | Reference | Ethics committee                                                                                 | Informed consent                                      | # of MOC in analysis | # of MBOT in analysis |
|-------|-----------------------------------------------------------------|-----------|--------------|-------------------------------------------------------------------------------------------------------------------------------------------------------|-----------|--------------------------------------------------------------------------------------------------|-------------------------------------------------------|----------------------|-----------------------|
| AOV   | Alberta Ovarian Tumor Types Study                               | Canada    | 1978-2010    | Population-based Alberta Cancer Registry; annual updates performed for vital statistics                                                               | 1         | Health Research Ethics Board of Alberta                                                          | No / pathology material                               | 62                   | 57                    |
| BAV   | Bavarian Ovarian Cancer Study                                   | Germany   | 2002-2006    | Gynecologic Oncology Center at the Comprehensive Cancer Center Erlangen-Nuremberg                                                                     | 2         | Ethics Committee of the Medical Faculty of the Friedrich-Alexander University Erlangen-Nuremberg | Yes                                                   | 11                   | 1                     |
| DOV   | Diseases of the Ovary and their Evaluation                      | US        | 2002-2009    | 13 counties from western Washington SEER registry                                                                                                     | 3,4       | Fred Hutchinson Cancer Research Center Institutional Review Board                                | Yes                                                   | 21                   | 0                     |
| HAW   | Hawaii Ovarian Cancer Study                                     | US        | 1993-2008    | Hawaii Tumor Registry and medical records                                                                                                             | 5,6       | University of Hawaii, Committee on Human Studies                                                 | Yes                                                   | 9                    | 0                     |
| MAY   | Mayo Clinic Ovarian Cancer Study                                | US        | 2000-2013    | Mayo Clinic Division of Gynecologic Oncology (Rochester, MN)                                                                                          | 7         | Institutional Review Board of Mayo Clinic                                                        | Yes                                                   | 11                   | 0                     |
| NOT   | Nottingham Study                                                | UK        | 1991-2011    | Hospital records and Trent cancer registry                                                                                                            | 8         | Institutional Review Board of Mayo Clinic                                                        | No / pathology material                               | 32                   | 0                     |
| SEA   | Study of Epidemiology and Risk Factors in Cancer Heredity       | UK        | 1998-present | Eastern Region Cancer Intelligence Unit, West Midlands Cancer Intelligence Unit, and multiple cancer networks                                         | 9         | Cambridgeshire 4 Research Ethics Committee                                                       | Yes                                                   | 25                   | 6                     |
| STA   | Genetic Epidemiology of Ovarian Cancer Study                    | US        | 1997-2001    | Greater Bay Area Cancer Registry                                                                                                                      | 10        | Stanford University IRB                                                                          | Yes                                                   | 9                    | 12                    |
| SWE   | Sweden Western Region Ovarian Cancer Study                      | Sweden    | 2001-2016    | Sahlgrenska University Hospital, medical records and the clinical cancer register in the western Sweden health care region and Swedish death register |           | Regional ethics review board in Gothenburg (Swedish Ethical Review Authority)                    | Yes                                                   | 9                    | 13                    |
| TVA   | Ovarian Cancer in Alberta                                       | Canada    | 2005-2011    | Alberta Cancer Registry and affiliated hospitals                                                                                                      | 11        | Health Research Ethics Board of Alberta                                                          | Yes                                                   | 6                    | 0                     |
| VAN   | Vancouver Ovarian Cancer Study                                  | Canada    | 1984-2000    | Ovarian Cancer Registry serving British Columbia and the Cheryl Brown Outcomes Unit                                                                   | 12,13     | University of British Columbia - British Columbia Cancer Agency Research Ethics Board            | Some cases Yes and some cases No / pathology material | 51                   | 2                     |
| WMH   | Westmead Hospital, Gynaecological Oncology Biobank (GynBiobank) | Australia | 1992-present | The Crown Princess Mary Cancer Centre and affiliated hospitals                                                                                        | 14        | Western Sydney Local Health District, Human Research Ethics Committee                            | Yes                                                   | 7                    | 8                     |
|       |                                                                 |           |              |                                                                                                                                                       |           |                                                                                                  |                                                       | 253                  | 99                    |
|       |                                                                 |           |              |                                                                                                                                                       |           |                                                                                                  |                                                       | 352                  |                       |

## References

1. Kelemen LE, Warren GW, Koziak JM, Köbel M, Steed H. Smoking may modify the association between neoadjuvant chemotherapy and survival from ovarian cancer. *Gynecol Oncol*. 2016 Jan;140(1):124-30.
2. Hein A, Thiel FC, Bayer CM, Fasching PA, Haberle L, Lux MP, et al. Hormone replacement therapy and prognosis in ovarian cancer patients. *Eur J Cancer Prev*. 2013;22:52-8.
3. DOVE – Rossing MA, Cushing-Haugen KL, Wicklund KG, et al. Menopausal hormone therapy and risk of epithelial ovarian cancer. *Cancer Epidemiol Biomarkers Prev* 2007; 16: 2548-56.
4. DOVE2 – Bodelon C, Cushing-Haugen KL, Wicklund KG, et al. Sun exposure and risk of epithelial ovarian cancer. *Cancer Causes and Control* 2012; 23(12): 1985-94.
5. Goodman MT, Lurie G, Thompson PJ, McDuffie KE, Carney ME. Association of two common single-nucleotide polymorphisms in the CYP19A1 locus and ovarian cancer risk. *Endocr Relat Cancer*. 2008;15:1055-60.
6. Lurie G, Wilkens LR, Thompson PJ, McDuffie KE, Carney ME, Terada KY, et al. Genetic polymorphisms in the Paraoxonase 1 gene and risk of ovarian epithelial carcinoma. *Cancer Epidemiol Biomarkers Prev*. 2008;17:2070-7.
7. Goode EL, Chenevix-Trench G, Hartmann LC, Fridley BL, Kalli KR, Vierkant RA, et al. Assessment of hepatocyte growth factor in ovarian cancer mortality. *Cancer Epidemiol Biomarkers Prev*. 2011;20:1638-48.
8. Williams E, Martin S, Moss R, Durrant L, Deen S. Co-expression of VEGF and CA9 in ovarian high-grade serous carcinoma and relationship to survival. *Virchows Arch*. 2012;461:33-9
9. Song H, Ramus SJ, Quaye L, Dicioccio RA, Tyrer J, Lomas E, et al. Common variants in mismatch repair genes and risk of invasive ovarian cancer. *Carcinogenesis*. 2006;27:2235-42.
10. McGuire V, Felberg A, Mills M, Ostrow KL, DiCiccio R, John EM, et al. Relation of contraceptive and reproductive history to ovarian cancer risk in carriers and noncarriers of BRCA1 gene mutations. *Am J Epidemiol*. 2004;160:613-8.
11. Cook LS, Leung AC, Swenerton K, Gallagher RP, Magliocco A, Steed H, et al. Adult lifetime alcohol consumption and invasive epithelial ovarian cancer risk in a population-based case-control study. *Gynecol Oncol*. 2015.
12. Prentice LM, Klausen C, Kalloger S, Kobel M, McKinney S, Santos JL, et al. Kisspeptin and GPR54 immunoreactivity in a cohort of 518 patients defines favourable prognosis and clear cell subtype in ovarian carcinoma. *BMC Med*. 2007;5:33.
13. Kobel M, Reuss A, Bois A, Kommos S, Kommos F, Gao D, et al. The biological and clinical value of p53 expression in pelvic high-grade serous carcinomas. *J Pathol*. 2010;222:191-8.
14. Emmanuel C, Chiew YE, George J, Etemadmoghadam D, Anglesio MS, Sharma R, et al. Genomic classification of serous ovarian cancer with adjacent borderline differentiates RAS pathway and TP53-mutant tumors and identifies NRAS as an oncogenic driver. *Clin Cancer Res*. 2014;20:6618-30.

**Supplementary Table 2. Frequencies of patterns of TP53 immunohistochemistry observed in ovarian mucinous borderline tumors (MBOT) and mucinous carcinomas (MOC) from the Genomic Analysis of Mucinous Tumors (GAMuT) cohort and Ovarian Tumor Tissue Analysis (OTTA) consortium.** Numbers of cases and percentages within each tumor type and all mucinous tumors combined are represented.

| Tumor Type   | Normal (%) | Abnormal (%) |           |         | Total (%) |
|--------------|------------|--------------|-----------|---------|-----------|
|              |            | OE           | CA        | CY      |           |
| <b>MBOT</b>  | 123 (80.4) | 24 (15.7)    | 6 (3.9)   | 0 (0)   | 153 (100) |
| <b>MOC</b>   | 140 (39.8) | 156 (44.3)   | 50 (14.2) | 6 (1.7) | 352 (100) |
| <b>Total</b> | 263 (52.1) | 180 (35.6)   | 56 (11.1) | 6 (1.2) | 505 (100) |

OE = overexpression, CA = complete absence, CY = cytoplasmic
